# Supplementary material
Source: PubMed Central journal article supplement (PMC5548382)
Supplement: NIHMS885856-supplement-Supporting_information.pdf [file NIHMS885856-supplement-Supporting_information.pdf]

## Supporting information for

### Click and Fluoresce: A Bioorthogonally Activated Smart Probe for Wash-free

### Fluorescent Labeling of Biomolecules

Xingyue Ji, Kaili Ji, Vayou Chittavong, Robert E. Aghoghovbia, Mengyuan Zhu, and  
Binghe Wang\*

Department of Chemistry and Center for Diagnostics and Therapeutics, Georgia State University,  
Atlanta, Georgia 30303 USA

\* Email: [wang@gsu.edu](mailto:wang@gsu.edu)

#### Table of contents

|      |                                                                                             |     |
|------|---------------------------------------------------------------------------------------------|-----|
| I.   | The quantum yield for compounds <b>5a-c</b> .....                                           | S1  |
| II.  | The determination of the second order reaction rates between <b>3a-c</b> and <b>4</b> ..... | S3  |
| III. | NMR spectra.....                                                                            | S7  |
| IV.  | Computational details.....                                                                  | S14 |

### I. Quantum yield for compound 5a-c

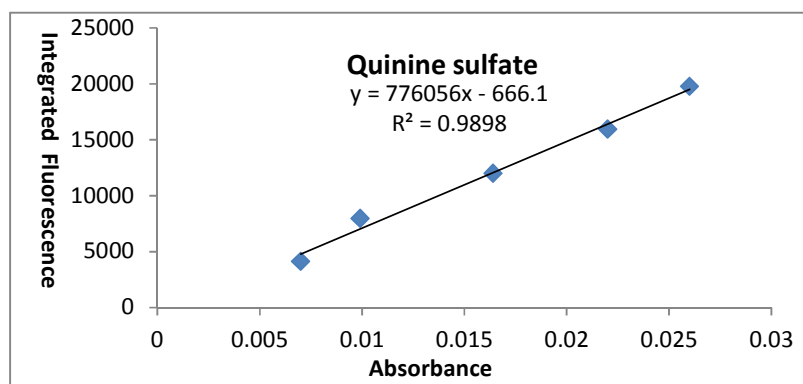

**Figure S1.** Plot of absorbance against integrated fluorescence intensity for the standard (excitation wavelength = 370 nM)

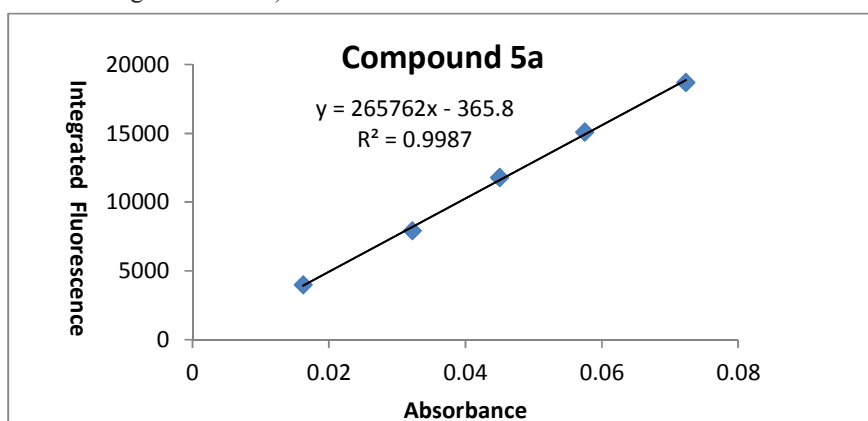

**Figure S2.** Plot of absorbance against integrated fluorescence intensity for **5a** (excitation wavelength = 370 nM),  $\Phi = 0.17 \pm 0.02$

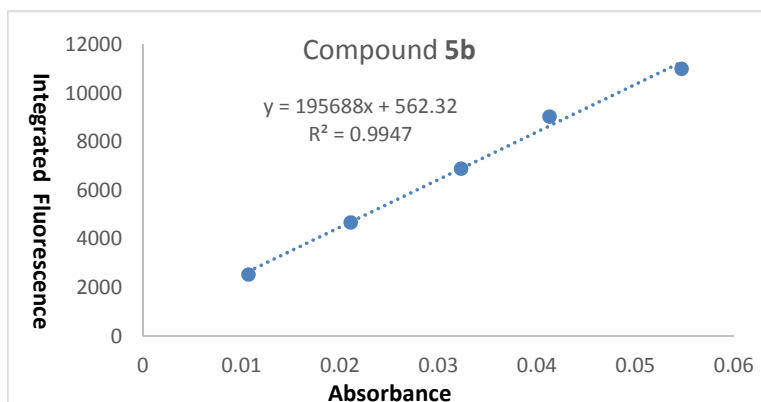

**Figure S3.** Plot of absorbance against integrated fluorescence intensity for **5b** (excitation wavelength = 370 nM),  $\Phi = 0.13 \pm 0.01$

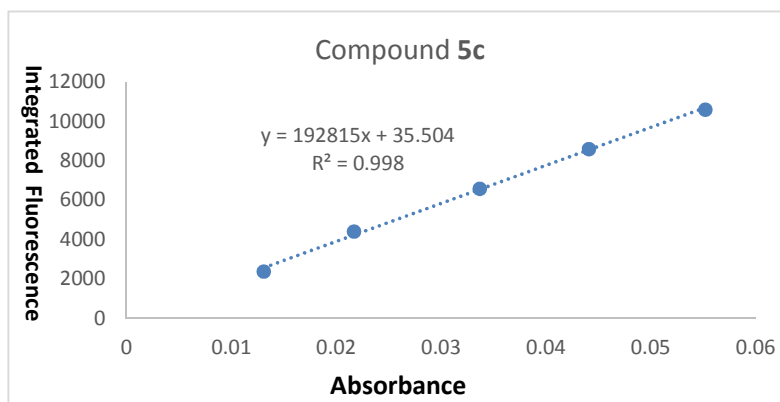

**Figure S4.** Plot of absorbance against integrated fluorescence intensity for **5c** (excitation wavelength = 368 nm),  $\Phi = 0.13 \pm 0.01$

## II. The second order reaction rate constants between **3a-c** and **4**

The fluorescent property of the cycloaddition product **5a-c** greatly facilitates the determination of the second order reaction rate constants between **3a-c** and **4** (DMSO/PBS = 10:1, 37 °C, the reaction rate constant for **3c** was determined at room temperature). Briefly, the second order reaction was treated as first order reaction by using an excessive amount of **4** (>10 fold), and the obtained  $k'$  was plotted against the concentration of **4** used. The obtained slope is the second order reaction rate constant between **3a-c** and **4** (Figures S6, 8 and 10).

### 3.1 Determination of the reaction rate constant between **4** and **3a**

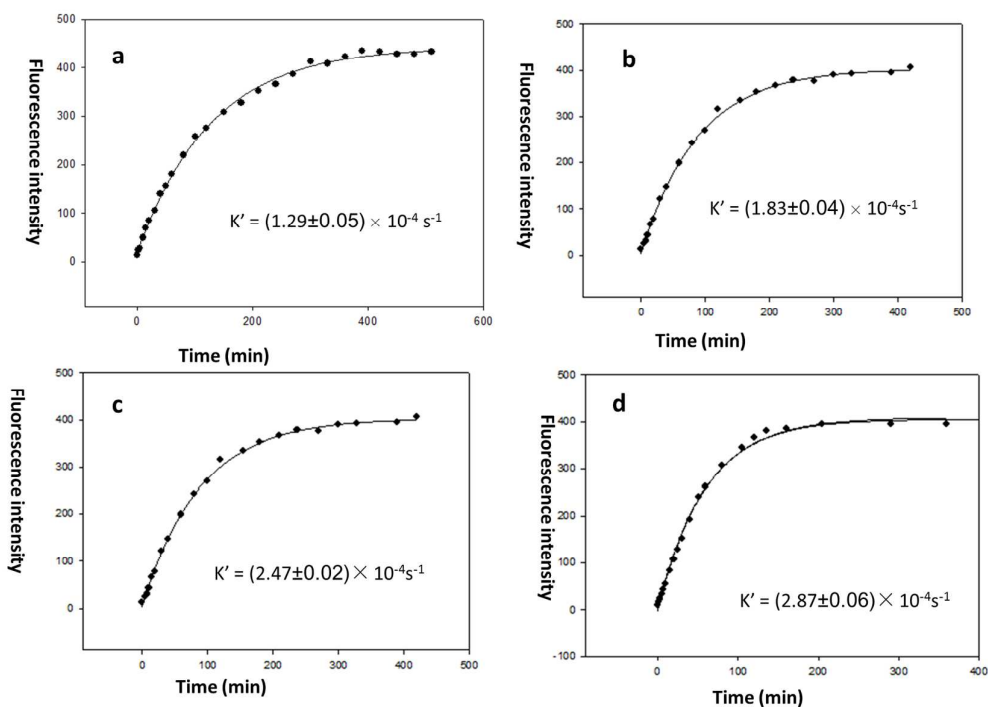

**Figure S5,** The pseudo first reaction between **4** and **3a**: a) **4** (1.18 mM) + **3a** (80  $\mu$ M); b) **4** (1.65 mM) + **3a** (80  $\mu$ M); c) **4** (2.12 mM) + **3a** (80  $\mu$ M); d) **4** (2.62 mM) + **3a** (80  $\mu$ M);

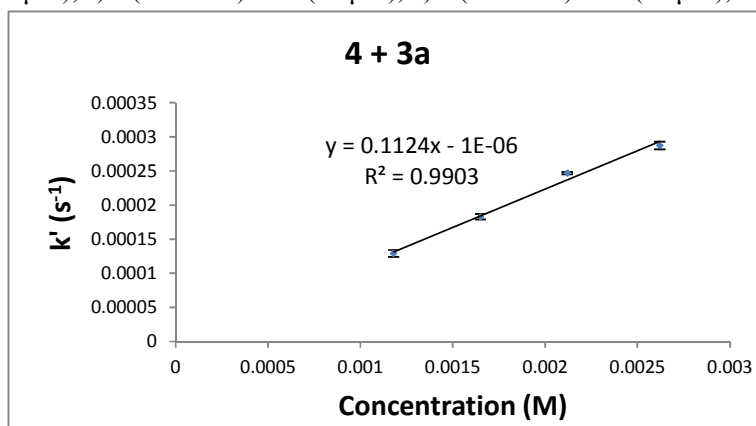

**Figure S6,** Plot of the obtained  $k'$  against the concentration of **4** used. The second order reaction rate constant  $k = 0.11 \pm 0.01 \text{ M}^{-1} \text{ s}^{-1}$ .

### 3.2 Determination of the reaction rate constant between 4 and 3b

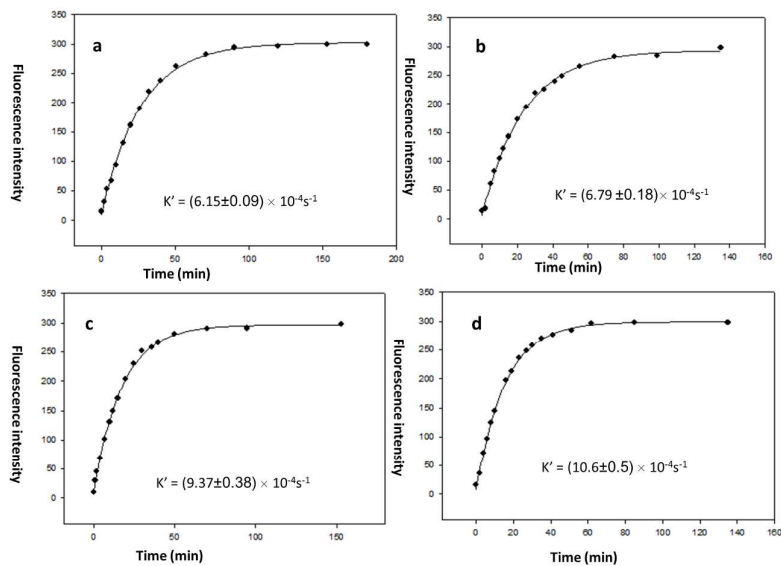

**Figure S7**, The pseudo first reaction between **4** and **3b**: a) **4** (492  $\mu\text{M}$ ) + **13b** (49  $\mu\text{M}$ ); b) **4** (614  $\mu\text{M}$ ) + **3b** (49  $\mu\text{M}$ ); c) **4** (738  $\mu\text{M}$ ) + **3b** (49  $\mu\text{M}$ ); d) **4** (860  $\mu\text{M}$ ) + **3b** (49  $\mu\text{M}$ );

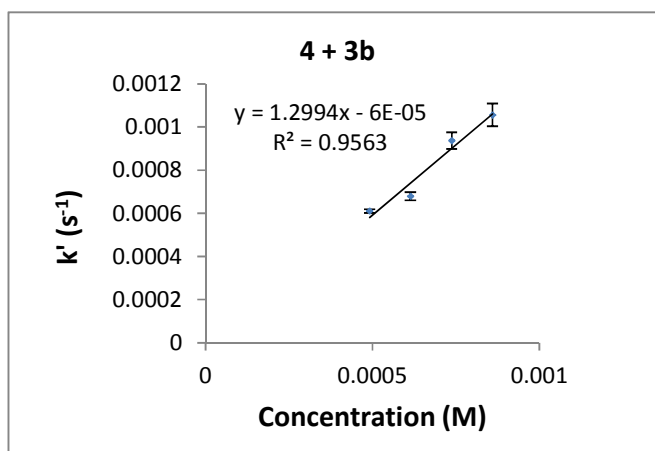

**Figure S8**, Plot of the obtained  $k'$  against the concentration of **4** used. The second order reaction rate constant  $k = 1.30 \pm 0.11 \text{ M}^{-1}\text{s}^{-1}$ .

### 3.3 The determination of the reaction rate constant between **4** and **3c**

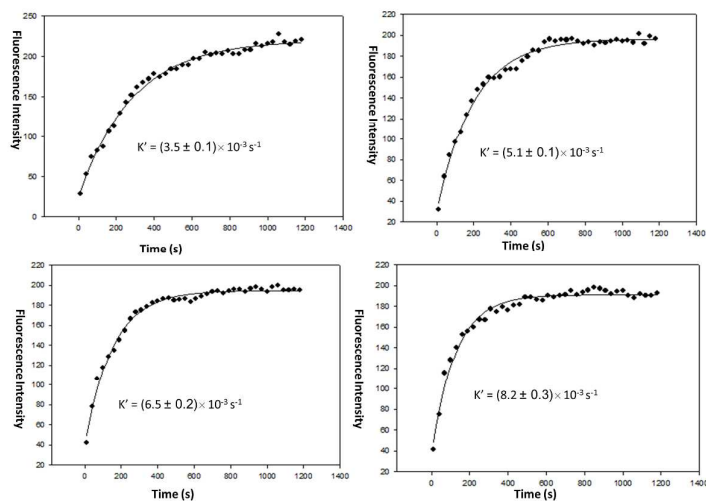

**Figure S9**, The pseudo first reaction between **4** and **3c**: a) **4** (498  $\mu\text{M}$ ) + **3c** (49  $\mu\text{M}$ ); b) **4** (610  $\mu\text{M}$ ) + **3c** (49  $\mu\text{M}$ ); c) **4** (747  $\mu\text{M}$ ) + **3c** (49  $\mu\text{M}$ ); d) **4** (871  $\mu\text{M}$ ) + **3c** (49  $\mu\text{M}$ );

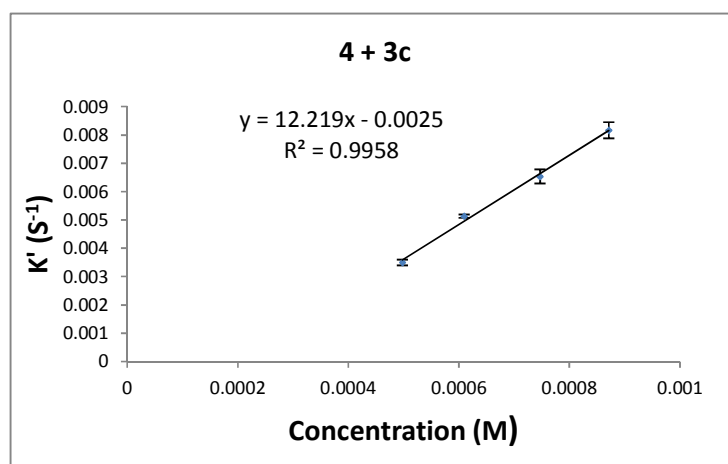

**Figure S10**, Plot of the obtained  $k'$  against the concentration of **4** used. The second order reaction rate constant  $k = 12.2 \pm 0.6 \text{ M}^{-1} \text{ s}^{-1}$ .

### III. NMR spectra

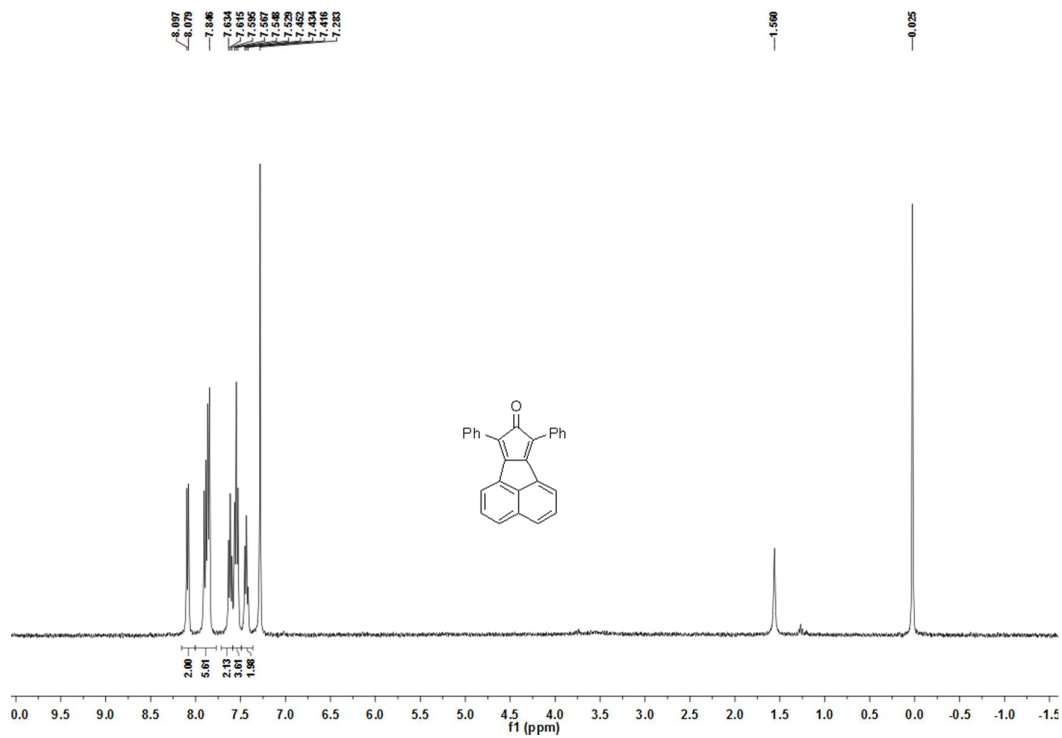

Figure S14. <sup>1</sup>H NMR spectrum for compound 3a

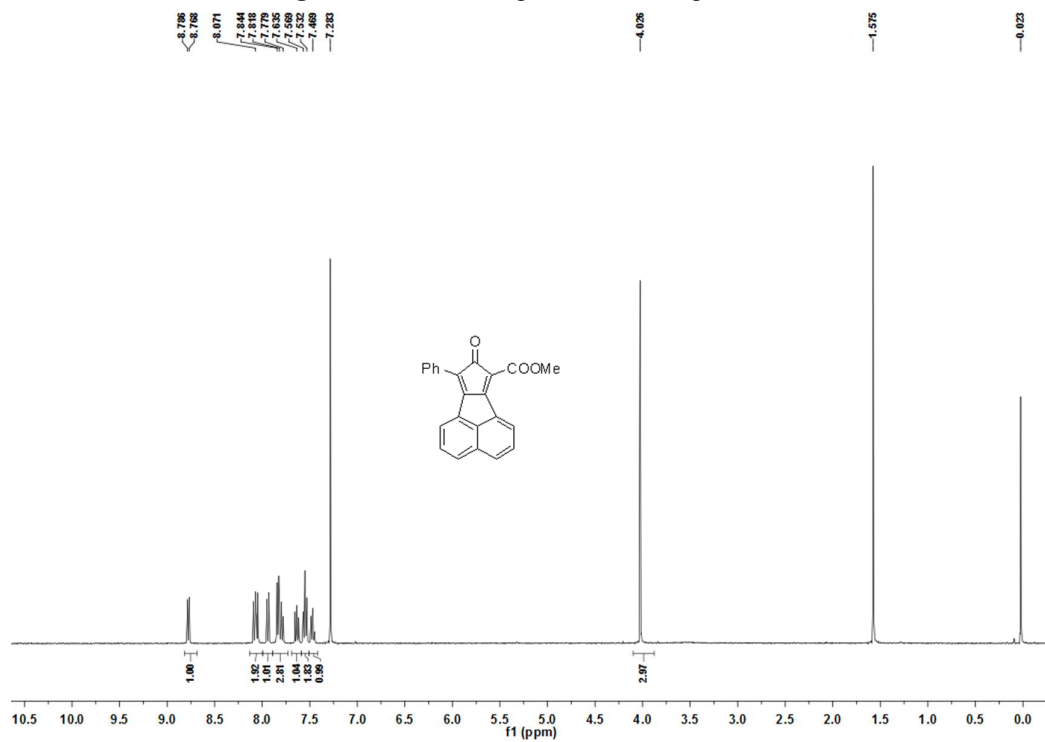

Figure S15. <sup>1</sup>H NMR spectrum for compound 3b

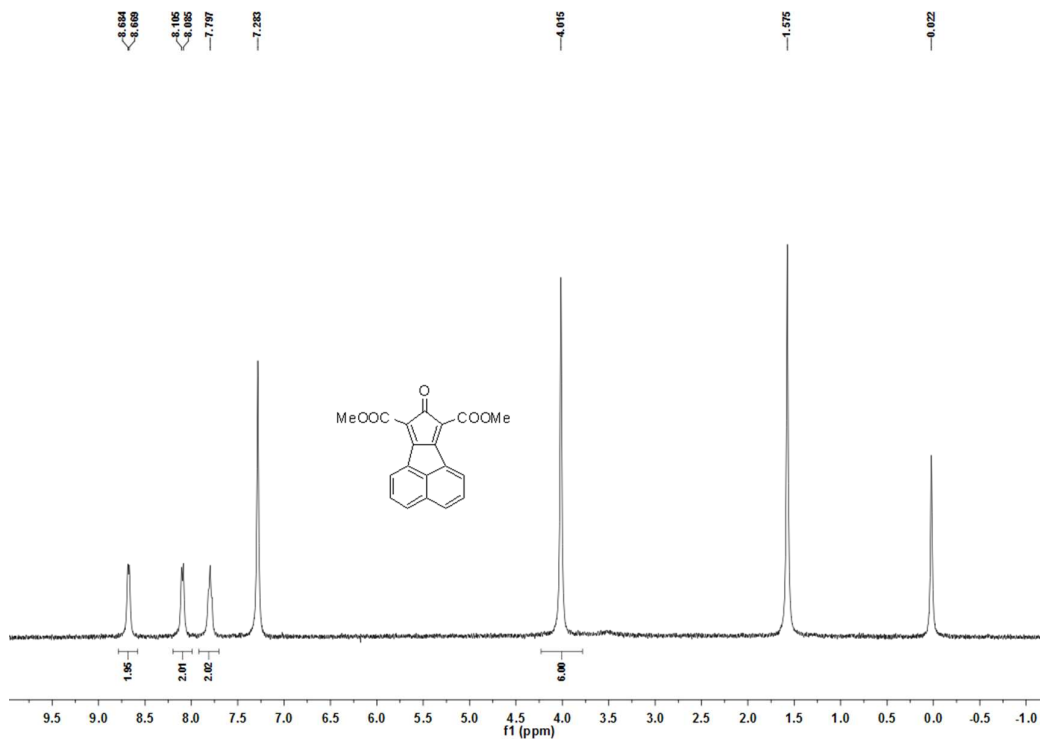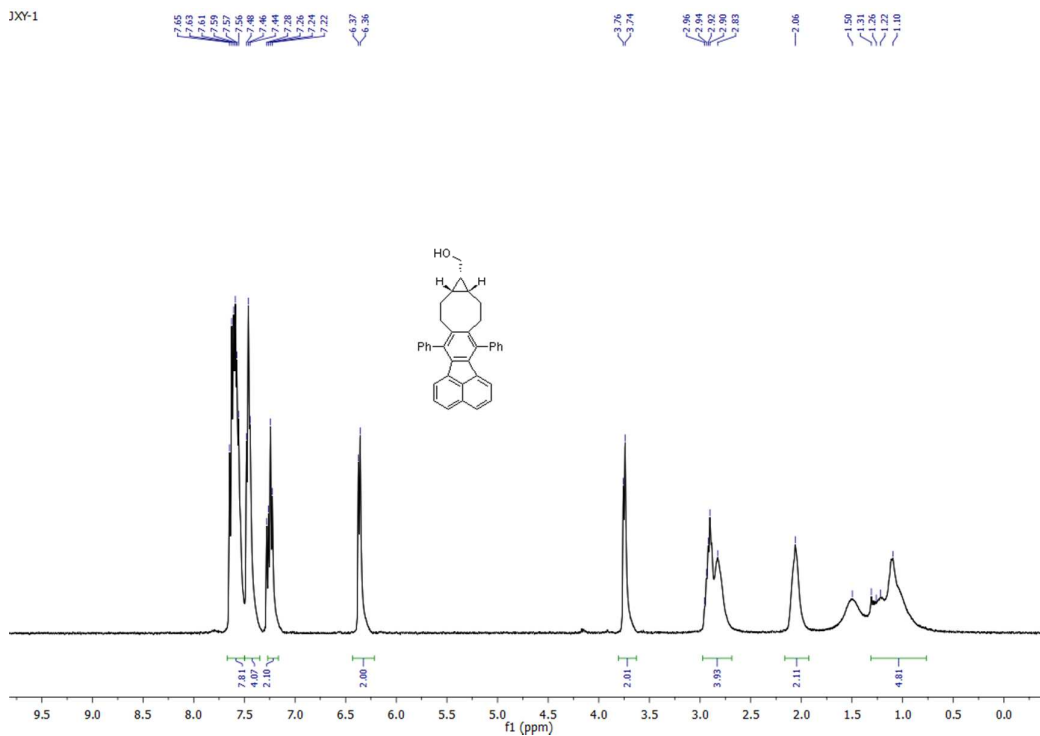



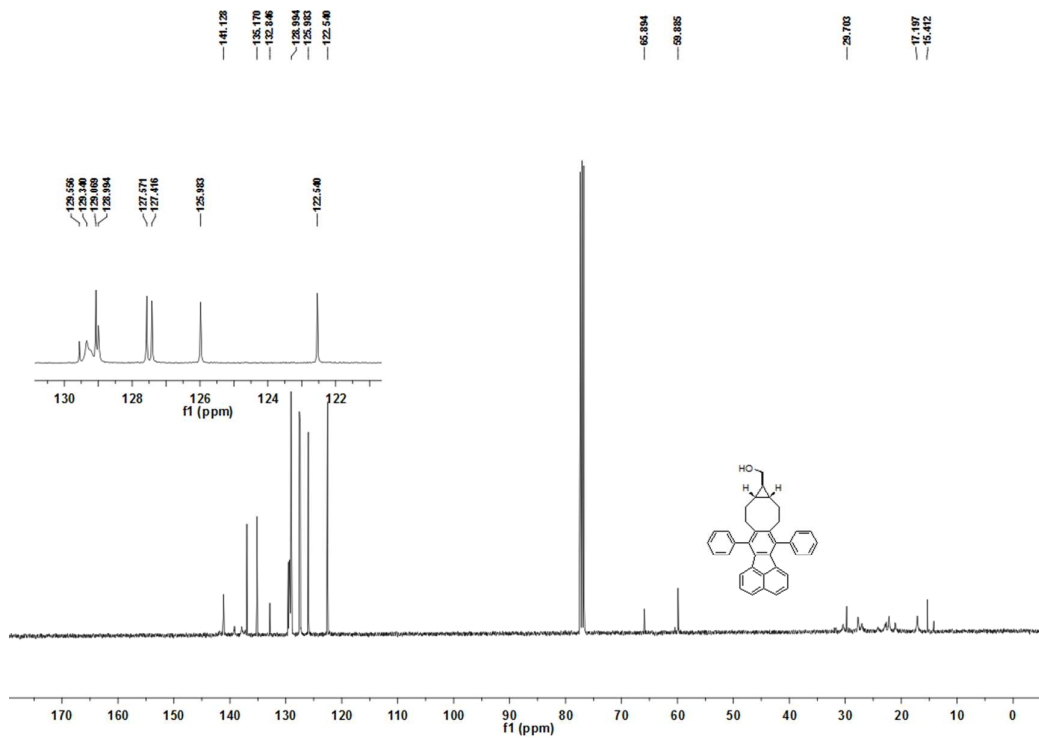

Figure S18.  $^{13}\text{C}$  NMR spectrum for compound 5a

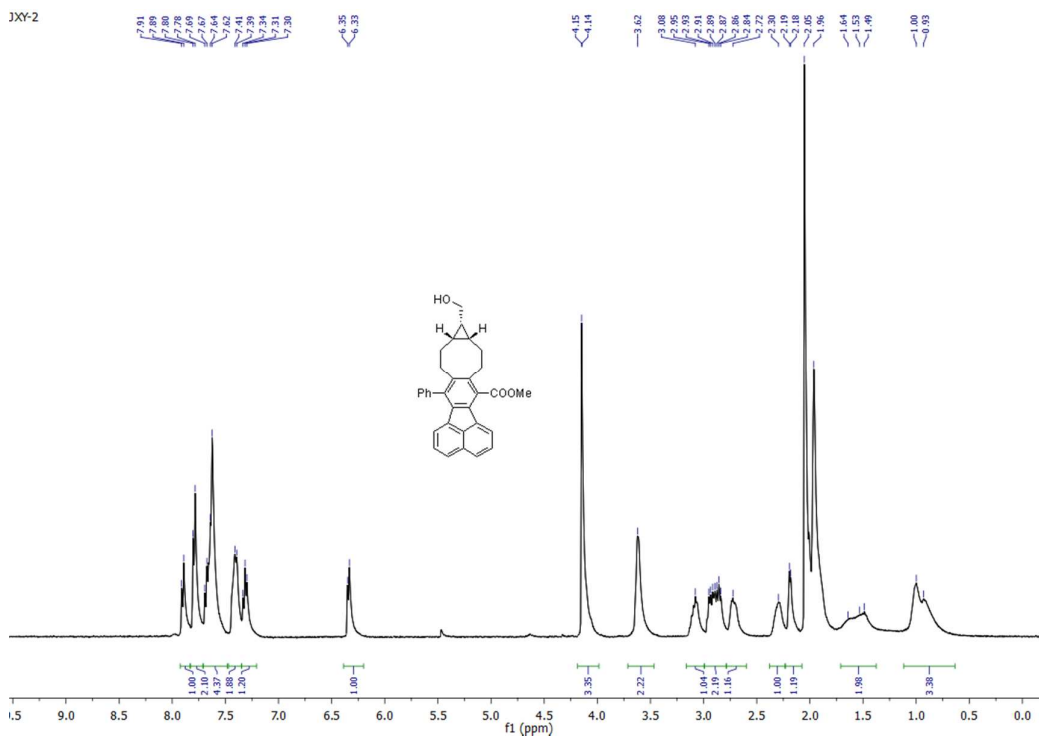

Figure S19.  $^1\text{H}$  NMR spectrum for compound 5b in  $\text{CD}_3\text{CN}$  at  $60^\circ\text{C}$

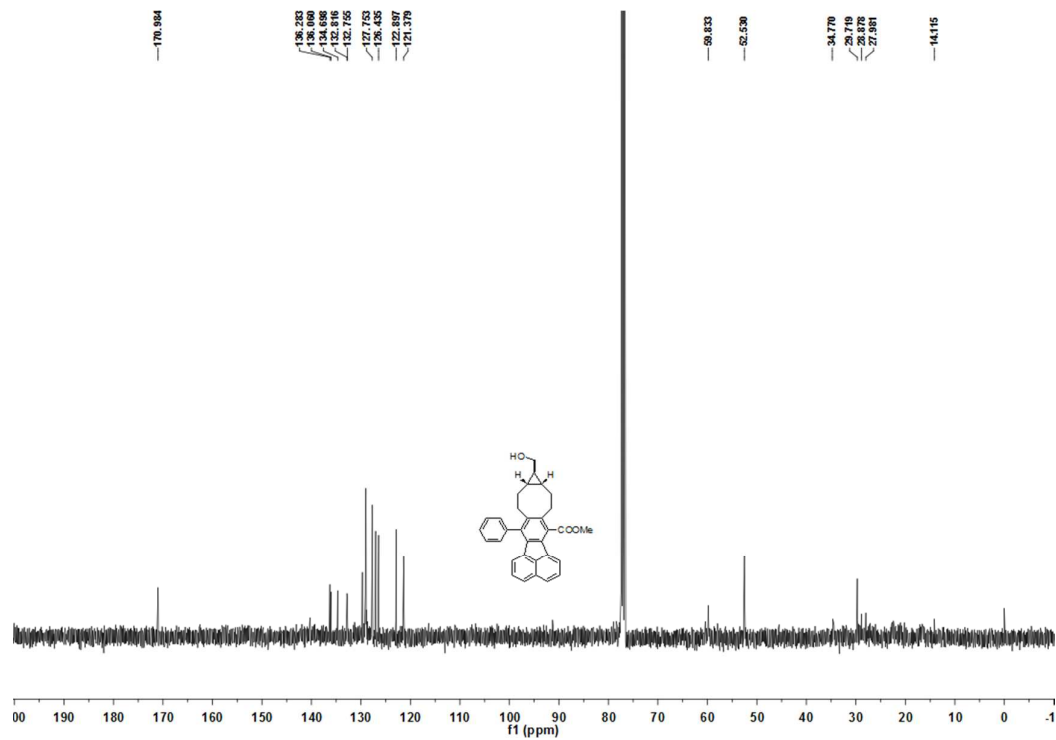

Figure S20. <sup>13</sup>C NMR spectrum for compound 5b

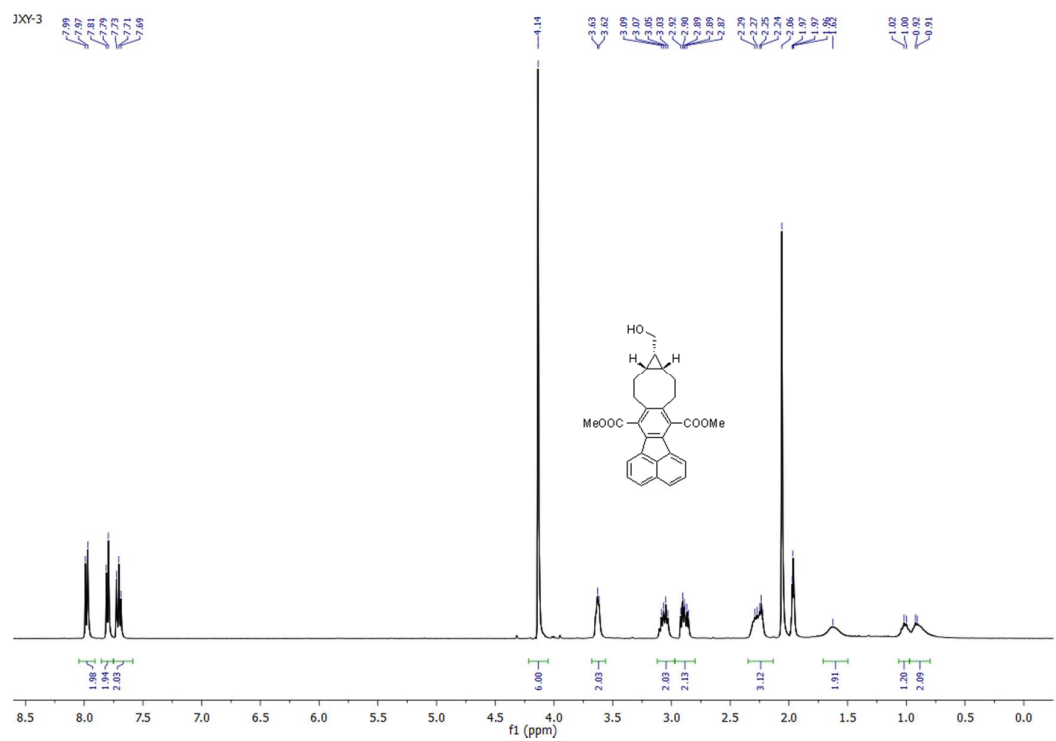

Figure S21. <sup>1</sup>H NMR spectrum for compound 5c in CD<sub>3</sub>CN at 60 °C



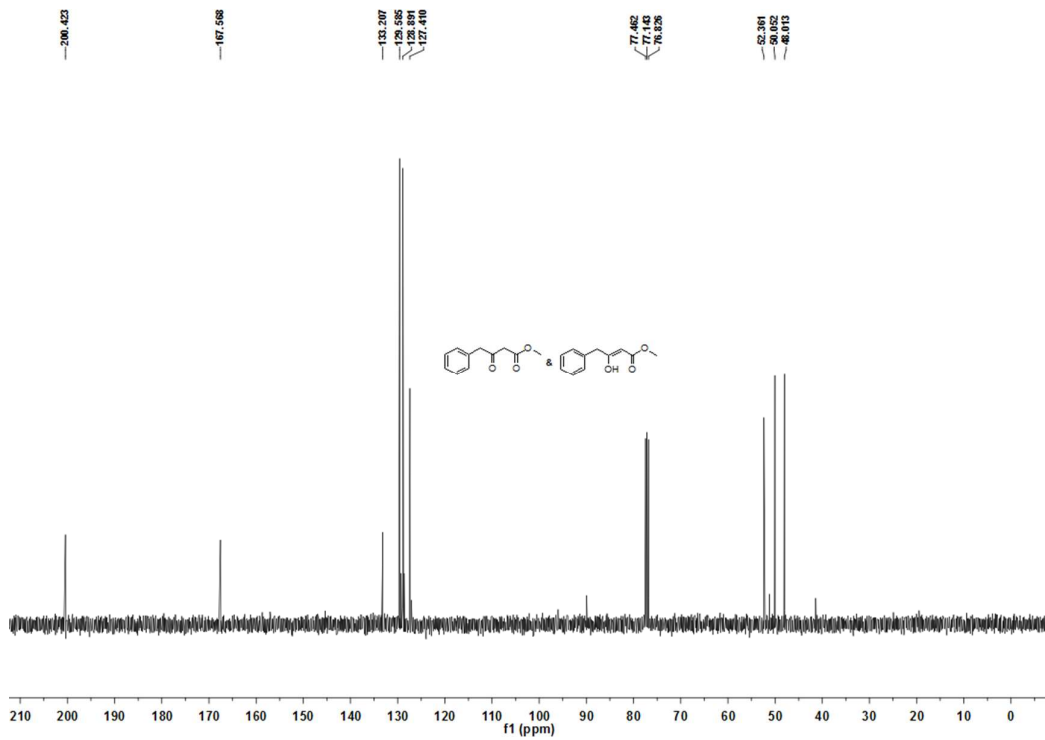

Figure S24. <sup>13</sup>C NMR spectrum for compound 1b

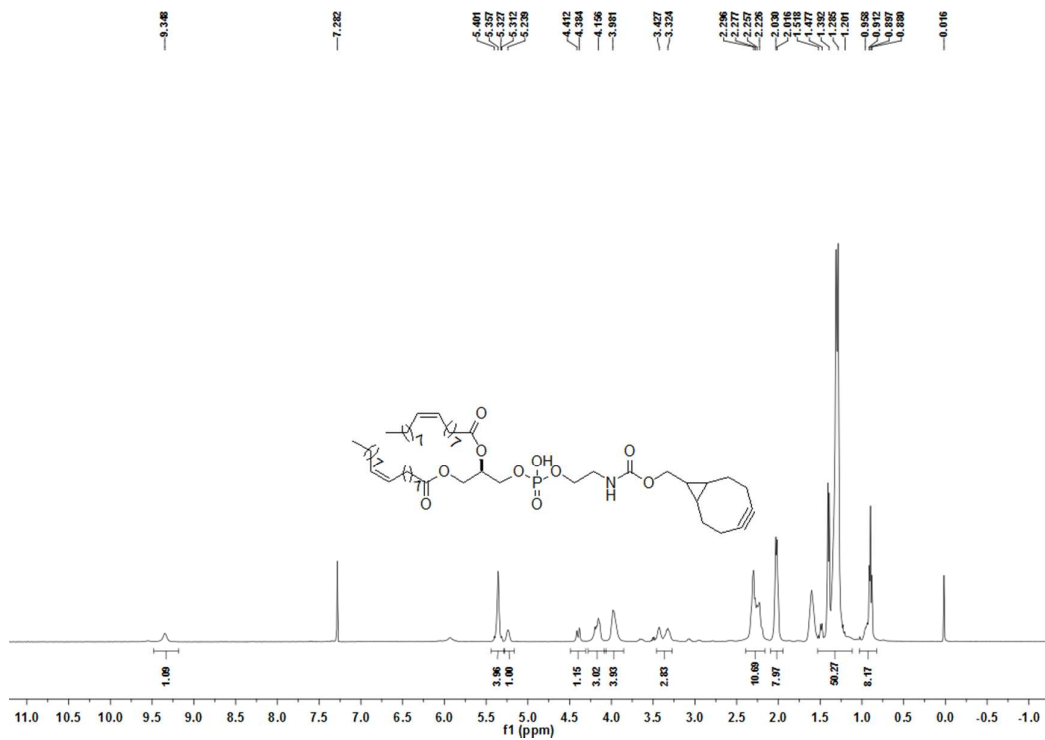

Figure S25. <sup>1</sup>H NMR spectrum for compound 7

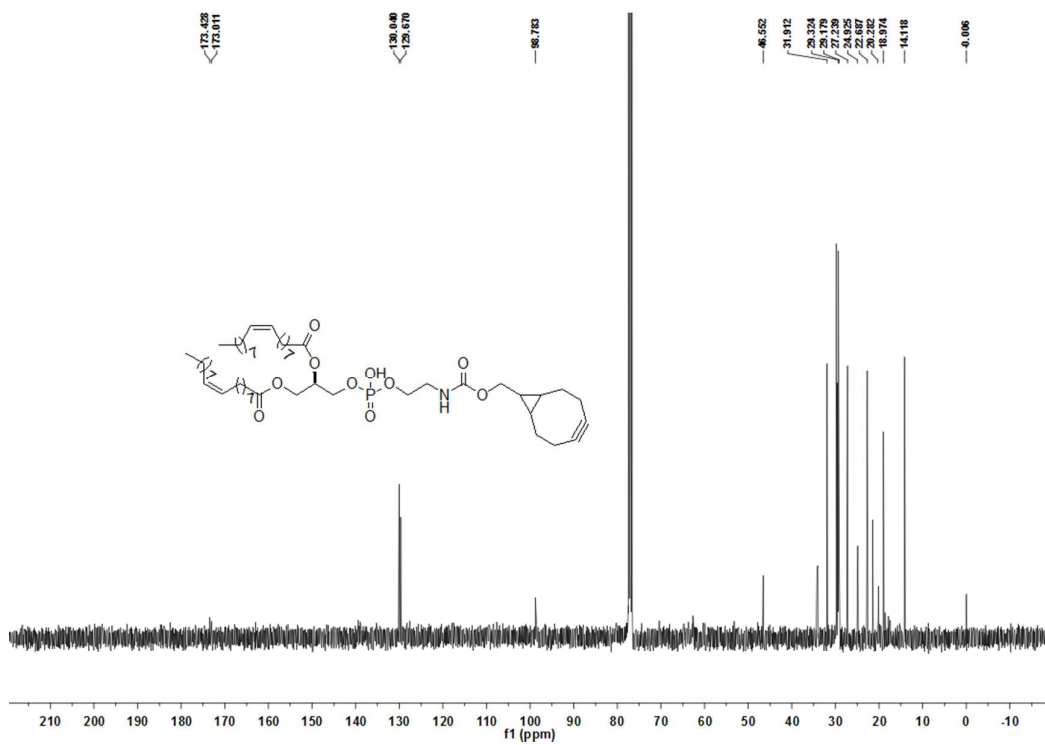

Figure S26.  $^{13}\text{C}$  NMR spectrum for compound 7

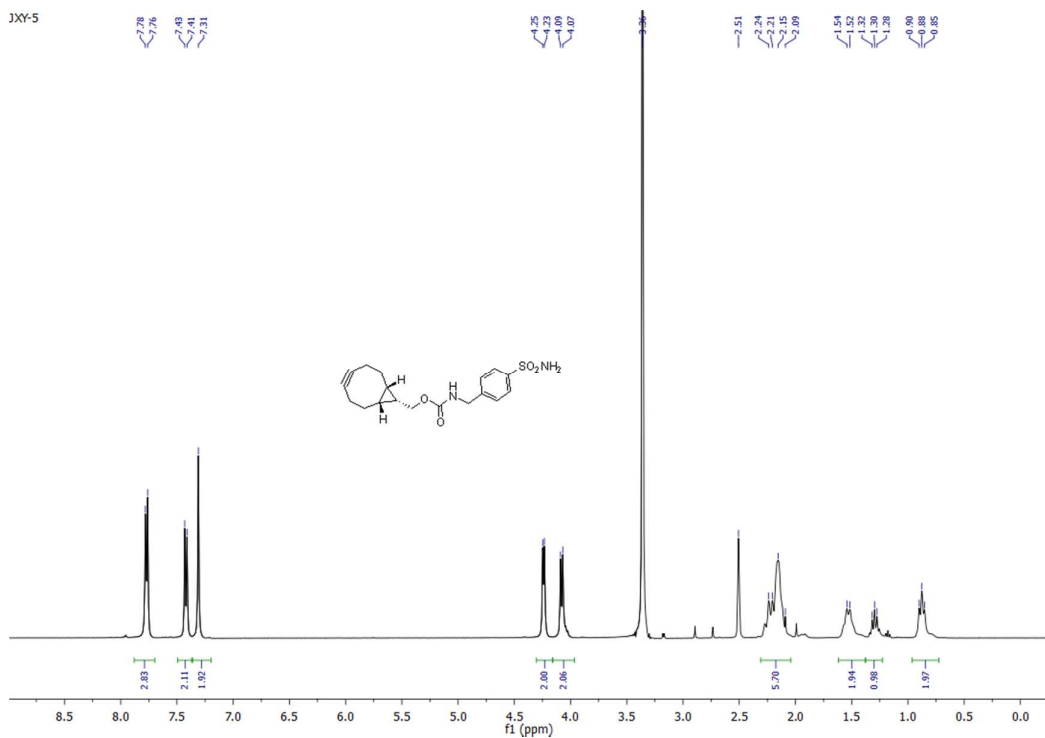

Figure S27.  $^1\text{H}$  NMR spectrum for compound 9

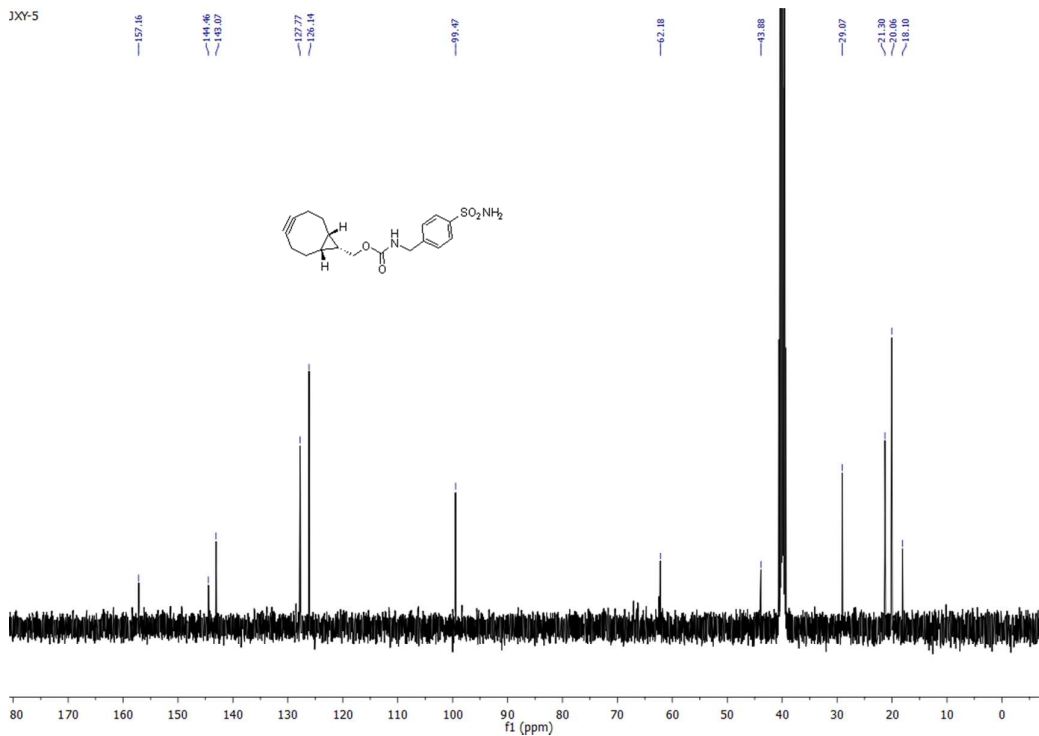

Figure S28.  $^{13}\text{C}$  NMR spectrum for compound 9

#### IV. Computational details

Table S1. Initial Cartesian coordinates (in Å) of structures by b3lyp/6-31g(d,p) method in gas phase.

| 3a |             |             |             |
|----|-------------|-------------|-------------|
| C  | -4.37965622 | -1.54675508 | -1.97519094 |
| C  | -3.52582805 | -0.69698765 | -1.22814743 |
| C  | -2.18926927 | -1.03464622 | -1.10559769 |
| C  | -1.72736993 | -2.23333441 | -1.73121151 |
| C  | -2.56291672 | -3.09172798 | -2.46836026 |
| C  | -3.92679855 | -2.70468697 | -2.58401978 |
| C  | -0.34160363 | -2.49408571 | -1.50043858 |
| C  | 0.21104092  | -3.64868424 | -2.02666034 |
| C  | -0.61526878 | -4.52019992 | -2.77956933 |
| C  | -1.95638044 | -4.26109228 | -3.00505759 |
| C  | -1.03661095 | -0.47440465 | -0.41458585 |
| C  | 0.13727409  | -1.40162892 | -0.66546515 |
| C  | -0.67414833 | 0.53104073  | 0.42003427  |
| C  | 0.77830691  | 0.26384144  | 0.76374202  |
| C  | 1.23056600  | -0.97345800 | 0.01295000  |
| O  | 1.47789798  | 0.94464138  | 1.52091219  |
| C  | -1.42182231 | 1.68362374  | 0.91319065  |
| C  | -1.25250644 | 2.15106302  | 2.22964452  |

|   |             |             |             |
|---|-------------|-------------|-------------|
| C | -1.97606082 | 3.24904364  | 2.68908225  |
| C | -2.87400106 | 3.90729336  | 1.84730302  |
| C | -3.03829896 | 3.46457296  | 0.53306143  |
| C | -2.31826612 | 2.36671421  | 0.07023238  |
| C | 2.59536100  | -1.48947700 | 0.05463400  |
| C | 3.69943549  | -0.62018619 | 0.12920600  |
| C | 4.99647166  | -1.12607359 | 0.17338200  |
| C | 5.22058175  | -2.50322561 | 0.13581977  |
| C | 4.13452997  | -3.37630020 | 0.04387098  |
| C | 2.83651392  | -2.87503239 | 0.00097922  |
| H | -5.42443138 | -1.27651024 | -2.06823400 |
| H | -3.93015630 | 0.19010257  | -0.76063322 |
| H | -4.61389679 | -3.32643770 | -3.14592501 |
| H | 1.25010195  | -3.90169851 | -1.86755915 |
| H | -0.17662239 | -5.42170555 | -3.18959832 |
| H | -2.55254313 | -4.95467900 | -3.58638626 |
| H | -0.55039269 | 1.65454995  | 2.88413692  |
| H | -1.83706713 | 3.59237451  | 3.70689463  |
| H | -3.43250925 | 4.76229952  | 2.20778487  |
| H | -3.71669979 | 3.98307693  | -0.13375313 |
| H | -2.41963841 | 2.05042780  | -0.96068292 |
| H | 3.53523957  | 0.44779704  | 0.14655465  |
| H | 5.83450498  | -0.44274277 | 0.23579604  |
| H | 6.23083709  | -2.89218208 | 0.16760033  |
| H | 4.30039406  | -4.44565202 | -0.00802037 |
| H | 1.99933841  | -3.55332119 | -0.10931125 |

**3b**

|   |             |             |             |
|---|-------------|-------------|-------------|
| C | 3.77360000  | -0.12660000 | -0.82730000 |
| C | 2.64850000  | 0.65840000  | -0.44280000 |
| C | 1.43960000  | 0.03840000  | -0.21800000 |
| C | 1.40120000  | -1.49100000 | -0.35030000 |
| C | 2.56400000  | -2.32620000 | -0.84960000 |
| C | 3.75370000  | -1.54400000 | -1.03470000 |
| C | -0.03360000 | -2.01920000 | -0.20700000 |
| C | -0.23220000 | -3.36490000 | -0.42130000 |
| C | 0.87160000  | -4.17990000 | -0.80570000 |
| C | 2.20590000  | -3.70570000 | -1.02310000 |
| C | 0.05950000  | 0.38510000  | 0.09200000  |
| C | -0.80500000 | -0.82220000 | 0.09850000  |
| C | -0.67640000 | 1.46490000  | 0.36770000  |
| C | -2.11000000 | 1.02790000  | 0.58160000  |
| C | -2.06280000 | -0.47150000 | 0.37810000  |
| O | -3.06670000 | 1.71440000  | 0.85130000  |

|   |             |             |             |
|---|-------------|-------------|-------------|
| C | -0.22330000 | 2.72060000  | 0.44230000  |
| C | -1.05030000 | 3.78320000  | 0.07830000  |
| C | -0.57750000 | 5.09320000  | 0.15600000  |
| C | 0.72220000  | 5.34050000  | 0.59770000  |
| C | 1.54920000  | 4.27800000  | 0.96180000  |
| C | 1.07640000  | 2.96790000  | 0.88400000  |
| C | -3.11600000 | -1.31310000 | 0.46480000  |
| O | -4.21400000 | -0.88190000 | 0.72510000  |
| O | -2.94300000 | -2.62440000 | 0.26230000  |
| C | -4.16640000 | -3.29450000 | 0.40300000  |
| H | 4.73040000  | 0.39540000  | -0.97620000 |
| H | 2.74450000  | 1.74810000  | -0.32670000 |
| H | 4.67990000  | -2.04940000 | -1.34580000 |
| H | -1.23220000 | -3.80590000 | -0.29710000 |
| H | 0.68510000  | -5.25480000 | -0.94620000 |
| H | 2.98130000  | -4.42180000 | -1.33300000 |
| H | -2.07530000 | 3.58810000  | -0.27000000 |
| H | -1.22970000 | 5.93120000  | -0.13110000 |
| H | 1.09500000  | 6.37360000  | 0.65900000  |
| H | 2.57410000  | 4.47310000  | 1.31020000  |
| H | 1.72860000  | 2.12990000  | 1.17100000  |
| H | -4.01490000 | -4.38400000 | 0.23330000  |
| H | -4.56230000 | -3.13110000 | 1.43020000  |
| H | -4.89280000 | -2.90060000 | -0.34260000 |

### 3c

|   |             |             |             |
|---|-------------|-------------|-------------|
| C | 3.90780000  | 0.33110000  | -0.78830000 |
| C | 2.78270000  | 1.11610000  | -0.40380000 |
| C | 1.57380000  | 0.49610000  | -0.17900000 |
| C | 1.53540000  | -1.03330000 | -0.31130000 |
| C | 2.69820000  | -1.86850000 | -0.81060000 |
| C | 3.88790000  | -1.08630000 | -0.99570000 |
| C | 0.10060000  | -1.56150000 | -0.16800000 |
| C | -0.09800000 | -2.90720000 | -0.38230000 |
| C | 1.00580000  | -3.72220000 | -0.76670000 |
| C | 2.34010000  | -3.24800000 | -0.98410000 |
| C | 0.19370000  | 0.84280000  | 0.13100000  |
| C | -0.67080000 | -0.36450000 | 0.13750000  |
| C | -0.54220000 | 1.92260000  | 0.40670000  |
| C | -1.97580000 | 1.48560000  | 0.62060000  |
| C | -1.92860000 | -0.01380000 | 0.41710000  |
| O | -2.93250000 | 2.17210000  | 0.89030000  |
| C | -0.08430000 | 3.19150000  | 0.48210000  |
| O | 1.08580000  | 3.42370000  | 0.29160000  |



|   |             |             |             |
|---|-------------|-------------|-------------|
| O | -0.92690000 | 4.19090000  | 0.76760000  |
| C | -2.98180000 | -0.85540000 | 0.50380000  |
| O | -4.07970000 | -0.42420000 | 0.76410000  |
| O | -2.80870000 | -2.16670000 | 0.30130000  |
| C | -4.03210000 | -2.83680000 | 0.44190000  |
| C | -0.23220000 | 5.40840000  | 0.79190000  |
| H | 4.86460000  | 0.85310000  | -0.93720000 |
| H | 2.87870000  | 2.20580000  | -0.28770000 |
| H | 4.81410000  | -1.59170000 | -1.30680000 |
| H | -1.09800000 | -3.34820000 | -0.25810000 |
| H | 0.81930000  | -4.79710000 | -0.90720000 |
| H | 3.11550000  | -3.96410000 | -1.29400000 |
| H | -3.88060000 | -3.92630000 | 0.27230000  |
| H | -4.42810000 | -2.67340000 | 1.46920000  |
| H | -4.75860000 | -2.44290000 | -0.30360000 |
| H | -0.93900000 | 6.23470000  | 1.02980000  |
| H | 0.56310000  | 5.36580000  | 1.56930000  |
| H | 0.23040000  | 5.59140000  | -0.20370000 |

4

|   |           |           |           |
|---|-----------|-----------|-----------|
| C | -1.112219 | 2.049303  | -0.259908 |
| C | 0.069062  | 1.789203  | -0.137195 |
| C | -2.526972 | 1.640286  | -0.204921 |
| C | 1.144487  | 0.832246  | 0.178486  |
| C | 0.581208  | -0.134259 | 1.232903  |
| C | -2.636082 | 0.567319  | 0.890581  |
| C | -0.537665 | -1.158554 | 1.013077  |
| C | -2.020681 | -0.836072 | 0.850392  |
| C | -1.260717 | -1.517767 | -0.268509 |
| C | -0.979258 | -0.918023 | -1.629695 |
| O | -2.079109 | -1.136557 | -2.505356 |
| H | -3.137706 | 2.539474  | 0.043852  |
| H | -2.859688 | 1.251717  | -1.193042 |
| H | 1.466789  | 0.291860  | -0.739510 |
| H | 2.014164  | 1.406461  | 0.575068  |
| H | 1.475491  | -0.741239 | 1.530209  |
| H | 0.310292  | 0.444515  | 2.149390  |
| H | -3.740869 | 0.397160  | 0.974515  |
| H | -2.340692 | 1.017186  | 1.869763  |
| H | -0.367870 | -2.001877 | 1.706442  |
| H | -2.662899 | -1.505578 | 1.450603  |
| H | -1.476277 | -2.591158 | -0.394705 |
| H | -0.099984 | -1.429315 | -2.082584 |
| H | -0.773549 | 0.161603  | -1.657154 |

H                    -1.877683   -0.766649   -3.368406
